# Supplementary material for: Characterization of Fungal FAD-Dependent AA3_2 Glucose Oxidoreductases from Hitherto Unexplored Phylogenetic Clades
Source: MDPI journal article supplement (doi:10.3390/jof7100873), 2021-10-17
Supplement: s1 [file s1]

## Characterization of fungal FAD-dependent AA3\_2 glucose oxidoreductases from hitherto unexplored phylogenetic clades

Sudarma Dita Wijayanti <sup>1,2</sup>, Leander Sützl <sup>1</sup>, Adèle Duval <sup>1</sup>, and Dietmar Haltrich <sup>1,\*</sup>

<sup>1</sup> Laboratory of Food Biotechnology, Department of Food Science and Technology, BOKU - University of Natural Resources and Life Sciences Vienna, Muthgasse 11, A-1190 Wien, Austria; [sudarma.wijayanti@boku.ac.at](mailto:sudarma.wijayanti@boku.ac.at) (S.D.W.); [leander.suetzl@boku.ac.at](mailto:leander.suetzl@boku.ac.at) (L.S.), [adele.duval@savencia.com](mailto:adele.duval@savencia.com) (A.D.)

<sup>2</sup> Department of Agricultural Product Technology, Brawijaya University, Veteran, 65145 Malang, East Java, Indonesia

\* Correspondence: [dietmar.haltrich@boku.ac.at](mailto:dietmar.haltrich@boku.ac.at) (D.H.)

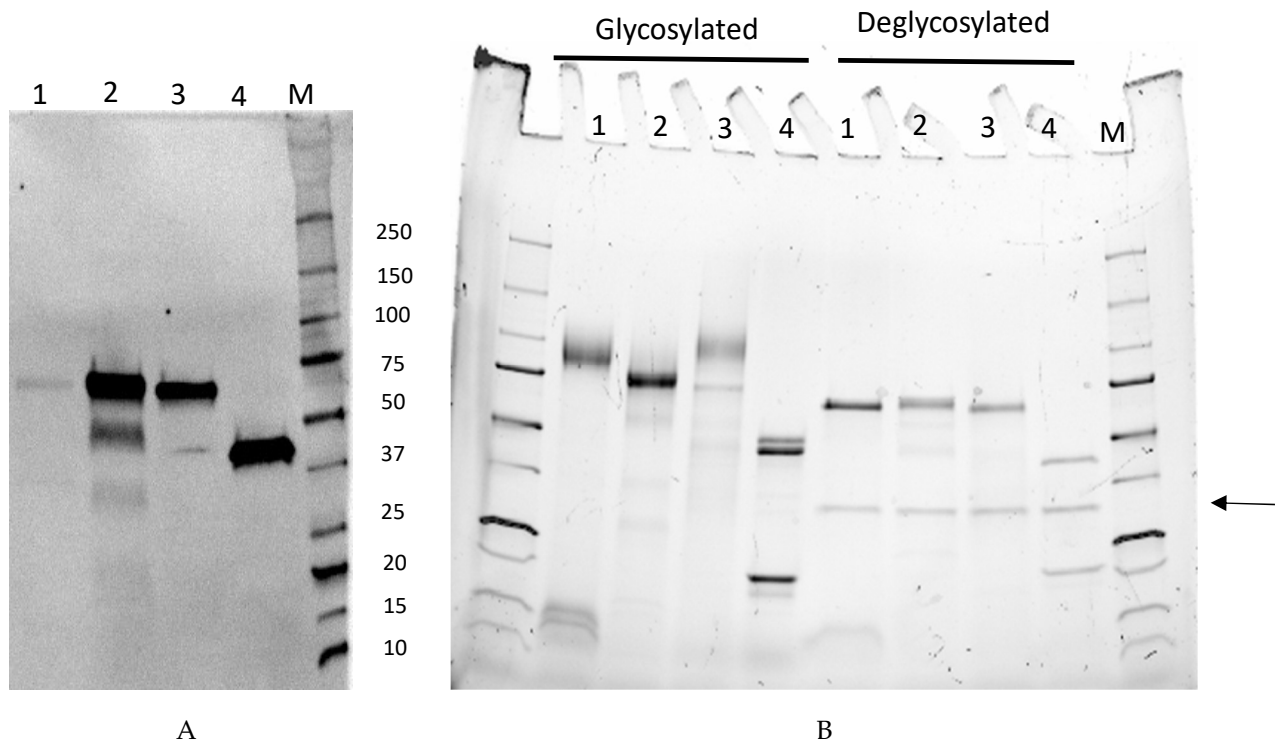

**Figure S1.** Western Blot analysis of His-tagged proteins in the culture supernatants of *K. phaffii* expression hosts (A) and SDS-polyacrylamide gel electrophoresis of purified AA3\_2 glucose oxidoreductases (B). GOx II from *Aureobasidium subglaciale* (1), GDH II from *Trichoderma virens* (2), GDH III from *Rhizoctonia solani* (3), and GDH III from *Ustilago maydis* (4). The position of PNGase F is indicated by an arrow, M indicates the molecular mass markers.

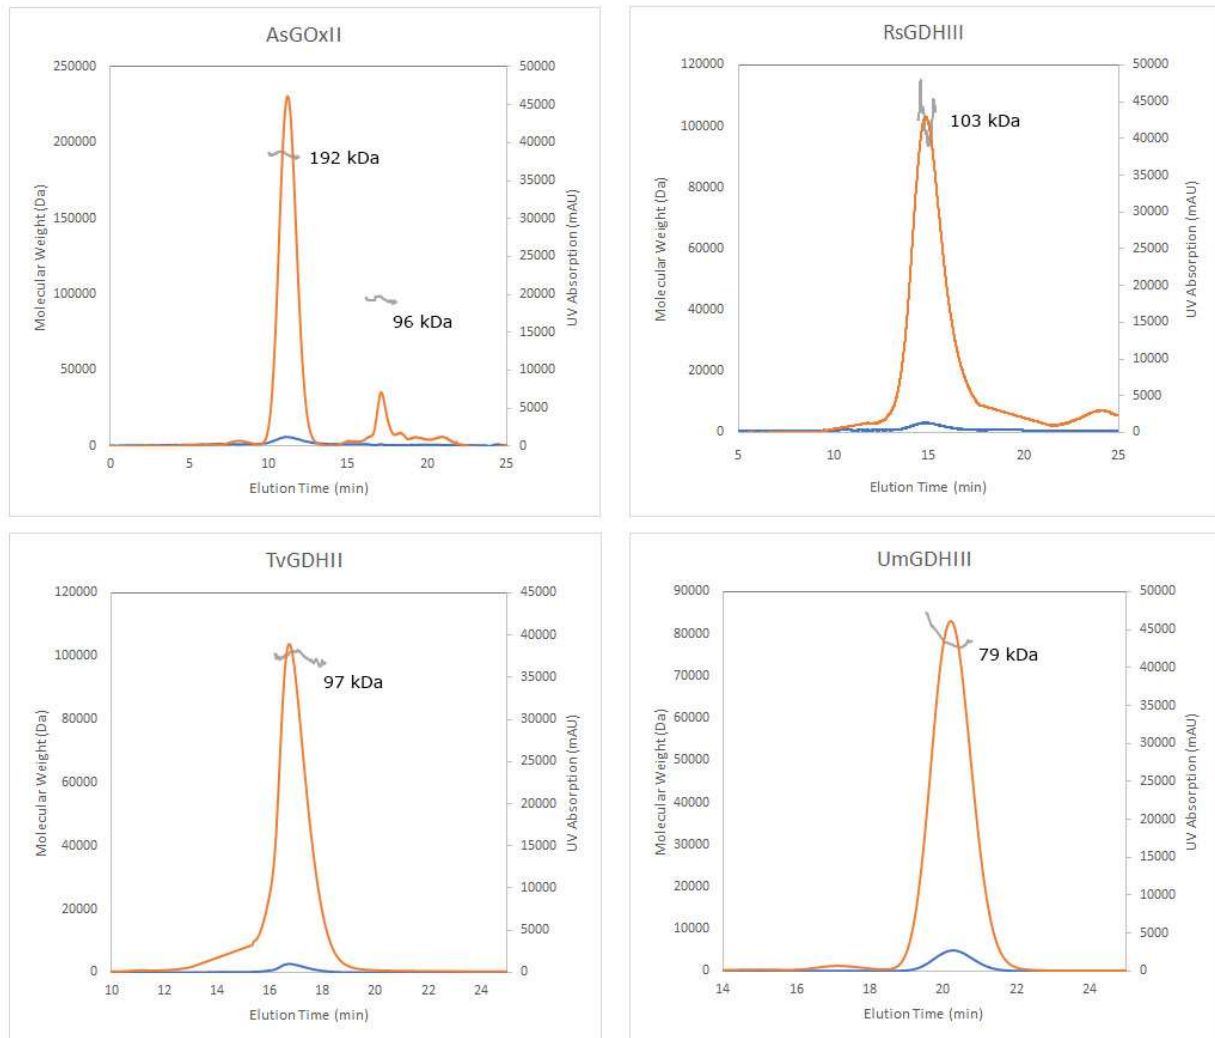

**Figure S2.** Molecular mass determination of AA3\_2 glucose oxidoreductases by SEC-MALS. (a) GOx II from *Aureobasidium subglaciale*, (b) GDH II from *Trichoderma virens*, (c) GDH III from *Rhizoctonia solani*, and (d) GDH III from *Ustilago maydis*. The absorbance measured is shown by orange lines (280 nm) and blue lines (450 nm).

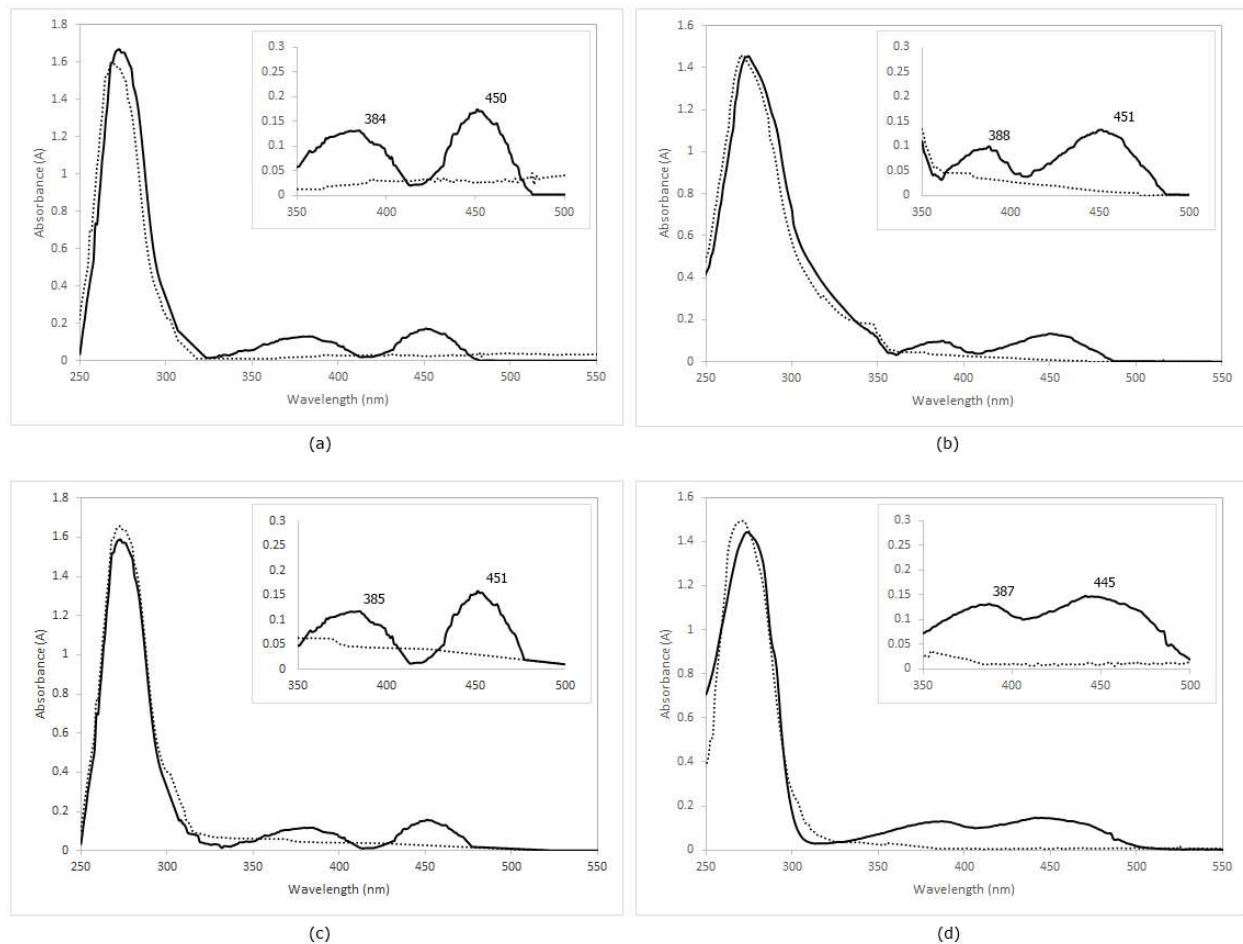

**Figure S3.** Absorption spectra of glycosylated GOx/GDH samples (a) GOx II from *Aureobasidium subglaciale*, (b) GDH II from *Trichoderma virens*, (c) GDH III from *Rhizoctonia solani*, and (d) GDH III from *Ustilago maydis*. The spectra of the oxidised enzymes are shown as solid lines, and the spectra of glucose oxidoreductases reduced by the addition of 100 mM glucose are shown as dashed lines.

A

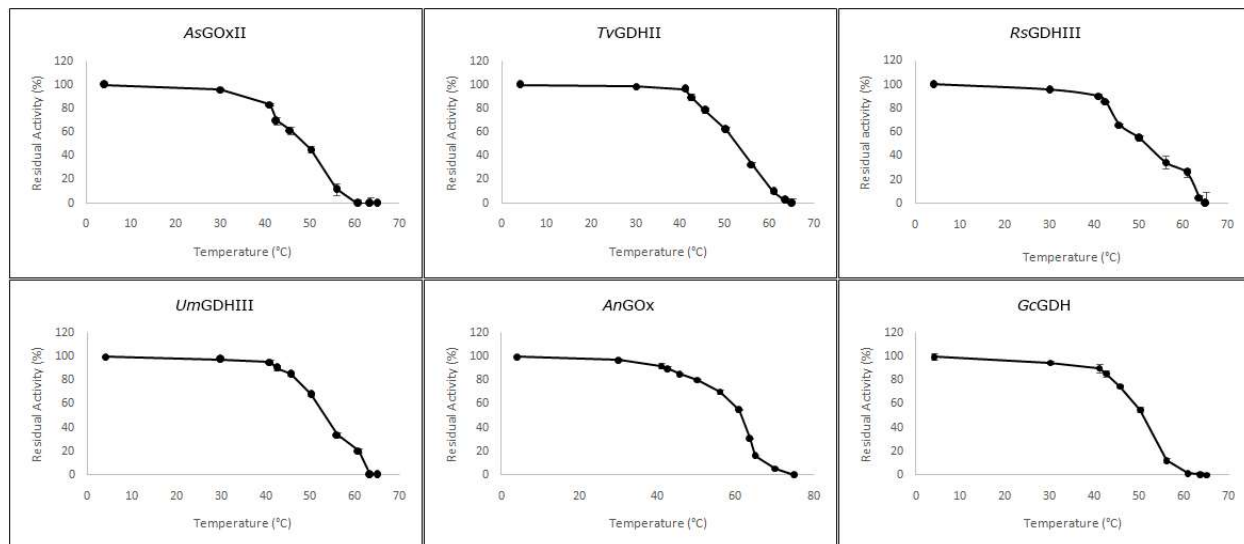

B

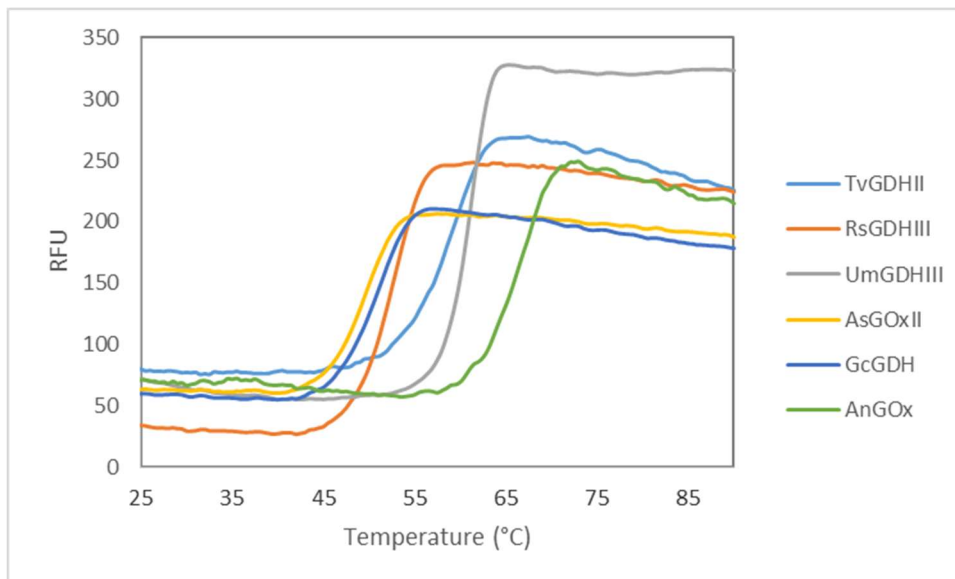

**Figure S4.** Effect of temperatures to enzyme activity determined by thermal inactivation assays (A), and thermal stability curves plotted against fluorescence signal determined by the ThermoFAD assay (B).

Table S1. Analysis of gene and protein sequences for selected glucose oxidoreductases

|   | Enzyme name,<br>source organism                  | GenBank entry | Full length gene                                |                                |                                                                     | Mature protein (as expressed)                      |                                    |                               |
|---|--------------------------------------------------|---------------|-------------------------------------------------|--------------------------------|---------------------------------------------------------------------|----------------------------------------------------|------------------------------------|-------------------------------|
|   |                                                  |               | ORF (base<br>pairs/amino<br>acids) <sup>a</sup> | GC Content<br>(%) <sup>a</sup> | Putative Signal<br>Peptidase Cleavage Site <sup>b</sup>             | Putative N<br>Glycosylation Sites <sup>c</sup>     | Calculated<br>MW (Da) <sup>d</sup> | Calculated<br>pI <sup>d</sup> |
| 1 | AsGOxII,<br><i>Aureobasidium<br/>subglaciale</i> | KEQ90431      | 1893/631                                        | 49                             | Cleavage site between<br>position 16 and 17,<br>probability: 0.8348 | N7, N36, N73, N83,<br>N184, N220, N368,<br>N396    | 66187.36                           | 5.18                          |
| 2 | TvGDHII,<br><i>Trichoderma virens</i>            | EHK19553      | 1842/ 614                                       | 48                             | Cleavage site between<br>position 24 and 25,<br>probability: 0.5057 | N167, N227, N232,<br>N291, N340, N492              | 64142.84                           | 4.87                          |
| 3 | RsGDHIII,<br><i>Rhizoctonia solani</i>           | CEL62789      | 1875/625                                        | 49                             | Cleavage site between<br>position 19 and 20,<br>probability: 0.7147 | N12, N189, N371,<br>N490                           | 64909.80                           | 7.81                          |
| 4 | UmGDHIII,<br><i>Ustilago maydis</i>              | KIS68464      | 1974/658                                        | 49                             | Cleavage site between<br>position 23 and 24,<br>probability: 0.8527 | N255, N380                                         | 67633.63                           | 9.37                          |
|   | AnGOx,<br><i>Aspergillus niger</i>               | CAA34197      | 1887/629                                        | 49                             | Cleavage site between<br>position 16 and 17,<br>probability: 0.4373 | N49, N95, N167,<br>N174, N264, N394,<br>N479       | 64876.18                           | 5.26                          |
|   | GcGDH,<br><i>Glomerella cingulata</i>            | AER13600      | 1818/606                                        | 61                             | Cleavage site between<br>position 16 and 17,<br>probability: 0.5703 | N55, N84, N176,<br>N184, N233, N255,<br>N339, N389 | 62997.89                           | 4.79                          |

<sup>a</sup> SnapGene Viewer<sup>b</sup> identified with SignalP 5.0<sup>c</sup> potential N-glycosylation sites identified with the program NetNGlyc 1.0<sup>d</sup> Compute pI/Mw (ExPASy Proteomics)

**Table S2.** Sequence similarity matrix of newly studied representatives of the GOx/GDH family and sequences of AA3\_2 glucose oxidoreductases with known crystal structures. Sequence similarity values are given in %. Values > 40% are highlighted in bold.

*PcGDHIII*, GDH III from *Pycnoporus cinnabarinus*; *AnGOx*, GOx from *Aspergillus niger*; *AfGDHI*, GDH I from *Aspergillus flavus*; *AsGOxII*, GOx II from *Aureobasidium subglaciale*; *TvGDHII*, GDH II from *Trichoderma virens*; *RsGDHIII*, GDH III from *Rhizoctonia solani*; and *UmGDHIII*, GDH III from *Ustilago maydis*.

|                           | <i>PcGDHIII</i><br>( <i>PcODH</i> ) | <i>AnGOx</i> | <i>AfGDHI</i> | <i>AsGOxII</i> | <i>TvGDHII</i> | <i>RsGDHIII</i> | <i>UmGDHIII</i> |
|---------------------------|-------------------------------------|--------------|---------------|----------------|----------------|-----------------|-----------------|
| <i>PcGDHIII</i><br>(6XUT) | 100                                 | 36.07        | 37.74         | 37.14          | 34.43          | <b>59.73</b>    | <b>45.92</b>    |
| <i>AnGOx</i><br>(1CF3)    | -                                   | 100          | 34.78         | 32.41          | 31.42          | 34.54           | 32.13           |
| <i>AfGDHI</i><br>(4YNT)   | -                                   | -            | 100           | 35.15          | <b>42.20</b>   | 36.68           | 38.41           |
